# Supplementary material for: Phenotype-genotype comorbidity analysis of patients with rare disorders provides insight into their pathological and molecular bases
Source: PLOS journal article supplement (doi:10.1371/journal.pgen.1009054), 2020-10-01
Supplement: S9 (10.1371/journal.pgen.1009054.s009) [file journal.pgen.1009054.s009]

## Supplementary Table 2

|                                | GO                                  |                                     | KEGG                                |                                     | REACTOME                            |                                     |
|--------------------------------|-------------------------------------|-------------------------------------|-------------------------------------|-------------------------------------|-------------------------------------|-------------------------------------|
|                                | Patients with<br>≥ 2<br>phenotypes: | Patients with<br>≥ 3<br>phenotypes: | Patients with<br>≥ 2<br>phenotypes: | Patients with<br>≥ 3<br>phenotypes: | Patients with<br>≥ 2<br>phenotypes: | Patients with<br>≥ 3<br>phenotypes: |
| <b>PhenCo<br/>Clusters</b>     | 895.00                              | 261.00                              | 586.00                              | 110.00                              | 458.00                              | 71.00                               |
| <b>Randomized<br/>Clusters</b> | 477.15 ±105.4                       | 32.59 ±14.9                         | 320.08 ±89.8                        | 33.23 ±15.2                         | 261.15 ±89.3                        | 15.24 ±89.3                         |

Table 2: Overlap between DECIPHER patient phenotypes and PhenCo clusters. Columns show total numbers of patients with at least 2 and 3 phenotypes in the same PhenCo cluster, for the real clusters and for clusters formed by randomizing Cluster-HPO membership, keeping the same number of HPOs per cluster and the same distribution of HPO terms.
